# Supplementary material
Source: PubMed Central journal article supplement (PMC2276717)

## S1. Colocalization of AGRP and NPY immunoreactivity with GFP reporter activity for Agrp-CRE activity

Colocalization of AGRP and NPY with GFP reporter fluorescence. Native GFP Fluorescence and Texas Red fluorescence was visualized under UV illumination and Captured on a confocal microscope. AGRP images were observed under a 20x Objective and NPY images were observed with a 40x objective.

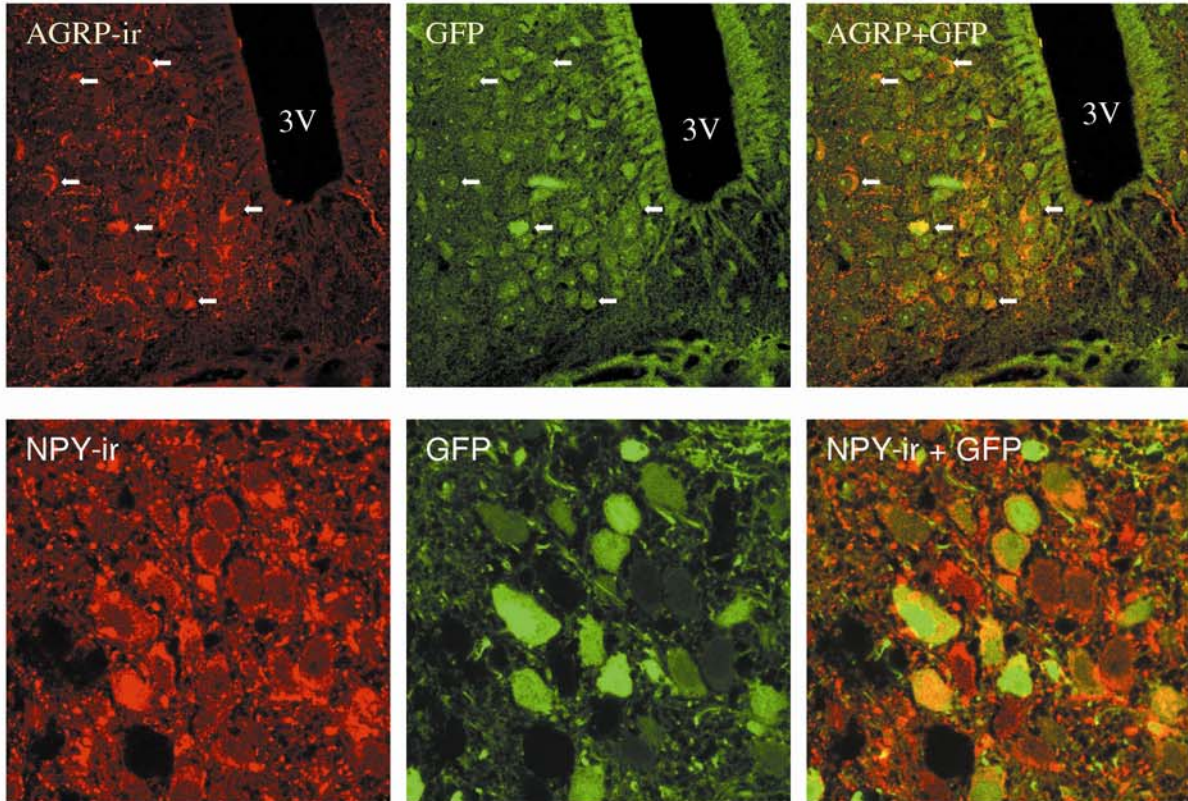

Supplement: endo_en.2007-1132_1.pdf [file endo_en.2007-1132_1.pdf]
